# Supplementary material
Source: publisher figshare collection journal article supplement (https://sage.figshare.com/ndownloader/files/14186276)
Supplement: Supplementary file 1 [file 14186276]

# Supplementary Table

*Number of Youth Involved in Each Offense Category by Disability (N = 41,812)*

|  | Person | | Property | | Drug | | Public Order | | School | | Other | | Petty | |
| --- | --- | --- | --- | --- | --- | --- | --- | --- | --- | --- | --- | --- | --- | --- |
|  | N | % | N | % | N | % | N | % | N | % | N | % | N | % |
| Autism | 87 | 26.85 | 52 | 16.05 | 18 | 5.56 | 74 | 22.84 | 4 | 1.23 | 41 | 12.65 | 48 | 14.81 |
| ID | 67 | 20.00 | 93 | 27.76 | 9 | 2.69 | 67 | 20.00 | 3 | 0.90 | 35 | 10.45 | 61 | 18.21 |
| ED | 553 | 17.72 | 740 | 23.72 | 185 | 5.93 | 759 | 24.33 | 30 | 0.96 | 332 | 10.64 | 521 | 16.70 |
| OHI | 282 | 13.19 | 447 | 20.91 | 213 | 9.96 | 338 | 15.81 | 34 | 1.59 | 375 | 17.54 | 449 | 21.00 |
| PSI | 17 | 10.12 | 36 | 21.43 | 13 | 7.74 | 24 | 14.29 | 0 | - | 36 | 21.43 | 42 | 25.00 |
| SLD | 331 | 10.65 | 737 | 23.71 | 227 | 7.30 | 475 | 15.28 | 31 | 1.00 | 579 | 18.63 | 728 | 23.42 |
| SLI | 38 | 11.76 | 70 | 21.67 | 26 | 8.05 | 54 | 16.72 | 3 | 0.93 | 47 | 14.55 | 85 | 26.32 |
| Section 504 | 48 | 7.08 | 91 | 13.42 | 89 | 13.13 | 64 | 9.44 | 11 | 1.62 | 215 | 31.71 | 160 | 23.60 |
| No Disability | 2,033 | 6.47 | 5,412 | 17.22 | 2,997 | 9.54 | 3,337 | 10.62 | 471 | 1.50 | 8,956 | 28.50 | 8215 | 26.14 |

ID = intellectual disability; ED = emotional disturbance; OHI = other health impairments; SLD = specific learning disability; SLI = speech/language impairments; PSI = Physical/sensory impairments.
